# Supplementary material for: Disparities in Exposure to Emerging Contaminants Across Demographic Groups in America: A NHANES-Based Analysis (2011-2018)
Source: Research Square preprint supplement (doi:10.21203/rs.3.rs-6590720/v1), 2025-05-30
Supplement: Supplementary file 1 [file 20879826e627b6786a969adc.docx]

**Table S1**

Comparison of mean biomarker levels across NHANES chemical groups. Different types of emerging contaminants (ECs) were expressed as mean.

| Chemical group | Chemical | 2011/12 | 2013/14 | 2015/16 | 2017/18 |
| --- | --- | --- | --- | --- | --- |
| Caffeine & Caffeine Metabolites (µmol/L) | 1-methyluric acid | 80.2 | 86.0 | No data | No data |
| 3-methyluric acid | 0.97 | 1.13 | No data | No data |
| 7-methyluric acid | 26.0 | 28.6 | No data | No data |
| 1,3-dimethyluric acid | 9.60 | 9.37 | No data | No data |
| 1,7-dimethyluric acid | 36.1 | 36.8 | No data | No data |
| 3,7-dimethyluric acid | 1.81 | 1.95 | No data | No data |
| 1,3,7-trimethyluric acid | 2.28 | 2.46 | No data | No data |
| 1-methylxanthine | 42.9 | 44.7 | No data | No data |
| 3-methylxanthine | 48.7 | 53.2 | No data | No data |
| 7-methylxanthine | 86.3 | 96.1 | No data | No data |
| 1,3-dimethylxanthine | 2.32 | 2.18 | No data | No data |
| 1,7-dimethylxanthine | 20.7 | 21.4 | No data | No data |
| 3,7-dimethylxanthine | 31.0 | 32.5 | No data | No data |
| 1,3,7-trimethylxanthine | 5.20 | 5.89 | No data | No data |
| 5-acetylamino-6-amino-3-methyluracil | 83.3 | 84.9 | No data | No data |
| Heavy Metal (µg/L) | Cobalt | No data | No data | 0.20 | 0.22 |
| Blood manganese | 10.2 | 10.5 | 10.7 | No data |
| Urinary Total Arsenic | 19.2 | 14.9 | 13.7 | No data |
| Perchlorate, Nitrate & Thiocyanate (µg/L) | Perchlorate, urine | 4.85 | 4.63 | 4.06 | 3.85 |
| Nitrate, urine | 59921 | 58193 | 60477 | 55477 |
| Thiocyanate, urine | 2722 | 2856 | 2391 | 1944 |
| Personal Care and Consumer Product Chemicals and Metabolites (µg/L) | Urinary Benzophenone-3 | No data | 253 | 264 | No data |
| Urinary Bisphenol A | No data | 2.76 | 2.32 | No data |
| Urinary Bisphenol S | No data | 1.44 | 1.52 | No data |
| Urinary Triclocarban | No data | 71.3 | 57.7 | No data |
| Methyl paraben | No data | 209 | 206 | No data |
| Propyl paraben | No data | 50.1 | 43.6 | No data |
| Urinary 2,4-dichlorophenol | 4.59 | 3.80 | 6.24 | No data |
| Urinary 2,5-dichlorophenol | 148 | 124 | 207 | No data |
| Pyrethroids, Herbicides, & Organophosphorus Metabolites (µg/L) | 2,4-dicholorphenoxyacetic acid | 0.53 | No data | 0.65 | No data |
| 3-phenoxybenzoic acid | 2.08 | No data | 2.02 | No data |
| *para*-Nitrophenol | 1.13 | No data | 0.98 | No data |
| Fluoride (µg/L) | Fluoride, Plasma | No data | 8.41 | 6.61 | No data |
| Fluoride, water | No data | 564 | 480 | No data |
| n-perfluorooctanoic acid | No data | No data | 1.81 | 1.63 |
| n-perfluorooctane sulfonic acid | No data | No data | 5.10 | 4.75 |
| Perfluorodecanoic acid | No data | No data | 0.26 | 0.27 |
| Perfluorohexane sulfonic acid | No data | 0.07 | 1.61 | 1.60 |
| Perfluorononanoic acid | No data | 0.07 | 0.78 | 0.57 |
| Perfluoromethylheptane sulfonic acid isomers | No data | No data | 1.94 | 1.76 |
| Nicotine Metabolites and Analogs (μg/L) | Total Cotinine, urine | No data | 1008 | 850 | 523 |
| Total Hydroxycotinine, urine | No data | 1931 | 1788 | 1022 |

**Table S2**

Potential mediators for all emerging contaminants (ECs).

| Emerging contaminant | Potential mediators | Mediators available in NHANES include |
| --- | --- | --- |
| 1,3,7-trimethyluric acid | Diet and medicines | Dietary assessment using total protein, fat, iron and calcium in the diet |
| 1,3,7-trimethylxanthine (caffeine) | Diet and medicines | Frequency of consumption of milk, cheese and other dairy products |
| 1,3-dimethyluric acid | Diet and medicines | Occupation data in the 2011/12, 2013/14, 2015/16 and 2017/18 waves |
| 1,3-dimethylxanthine (theophylline) | Diet and medicines | Prescription medications |
| 1,7-dimethyluric acid | Diet and medicines | Smoking data |
| 1,7-dimethylxanthine (paraxanthine) | Diet and medicines | Personal care products use |
| 1-methyluric acid | Diet and medicines |  |
| 1-methylxanthine | Diet and medicines |  |
| 2,4-dicholorphenoxyacetic acid | Occupation |  |
| Urinary 2,4-dichlorophenol | Diet, occupation and personal care products |  |
| Urinary 2,5-dichlorophenol | Diet, occupation and personal care products |  |
| 3,7-dimethyluric acid | Diet and medicines |  |
| 3,7-dimethylxanthine (theobromine) | Diet and medicines |  |
| 3-methyluric acid | Diet and medicines |  |
| 3-methylxanthine | Diet and medicines |  |
| 3-phenoxybenzoic acid | Occupation |  |
| 5-acetylamino-6-amino-3-methyluracil | Diet and medicines |  |
| 7-methyluric acid | Diet and medicines |  |
| 7-methylxanthine | Diet and medicines |  |
| Manganese, blood | Occupation |  |
| Cobalt | Diet |  |
| Fluoride, plasma, averaged | Water |  |
| Fluoride, water, averaged | Water |  |
| Methyl paraben | Diet, occupation and personal care products |  |
| Nitrate, urine | Diet, dairy products and water |  |
| n-perfluorooctane sulfonic acid (n-PFOS) | Occupation and personal care products |  |
| n-perfluorooctanoic acid (n-PFOA) | Occupation and personal care products |  |
| *para*-Nitrophenol | Occupation |  |
| Perchlorate, urine | Diet, occupation, dairy products and water |  |
| Perfluorodecanoic acid (PFDeA) | Occupation and personal care products |  |
| Perfluorohexane sulfonic acid (PFHxS) | Occupation and personal care products |  |
| Perfluorononanoic acid (PFNA) | Occupation and personal care products |  |
| Propyl paraben | Diet, occupation and personal care products |  |
| Perfluoromethylheptane sulfonic acid isomers (Sm-PFOS) | Occupation and personal care products |  |
| Thiocyanate, urine | Diet, dairy products and smoking |  |
| Total Cotinine, urine | Smoking |  |
| Total Hydroxycotinine, urine | Smoking |  |
| Urinary Total Arsenic | Water |  |
| Urinary Benzophenone-3 | Diet, occupation and personal care products |  |
| Urinary Bisphenol A | Diet, occupation and personal care products |  |
| Urinary Bisphenol S | Diet, occupation and personal care products |  |
| Urinary Triclosan | Diet, occupation and personal care products |  |


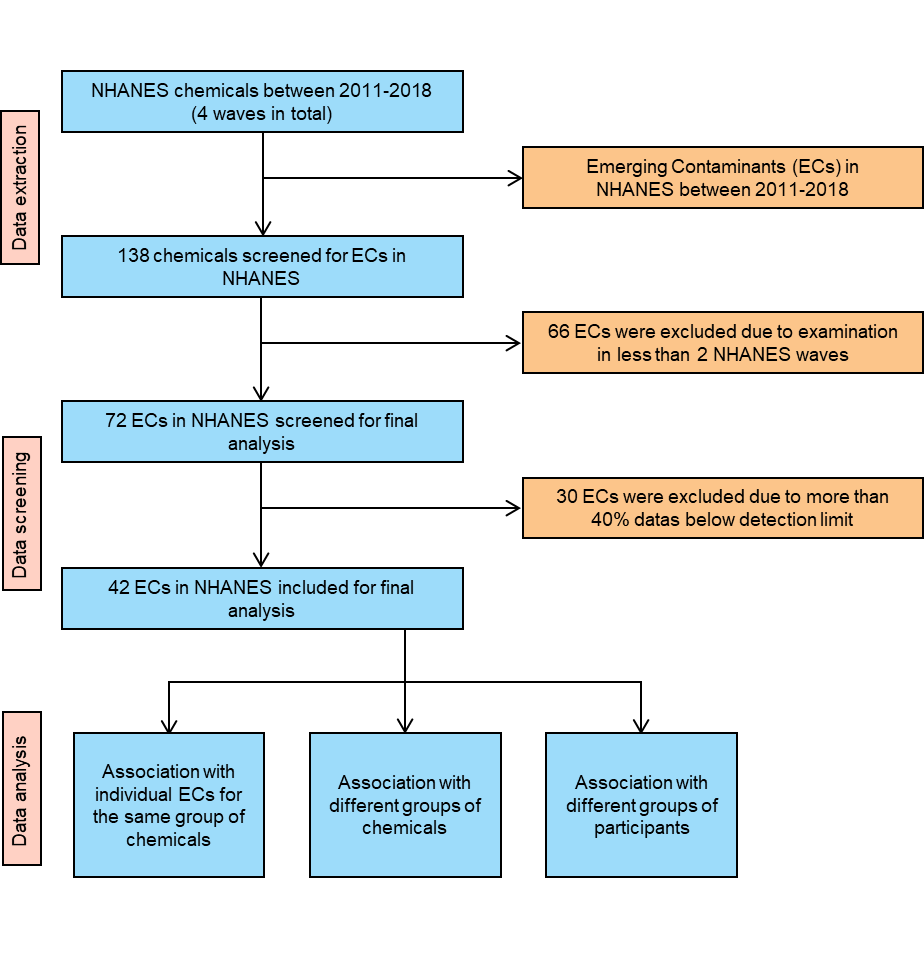


**Figure S1** Flowchart of chemicals

**
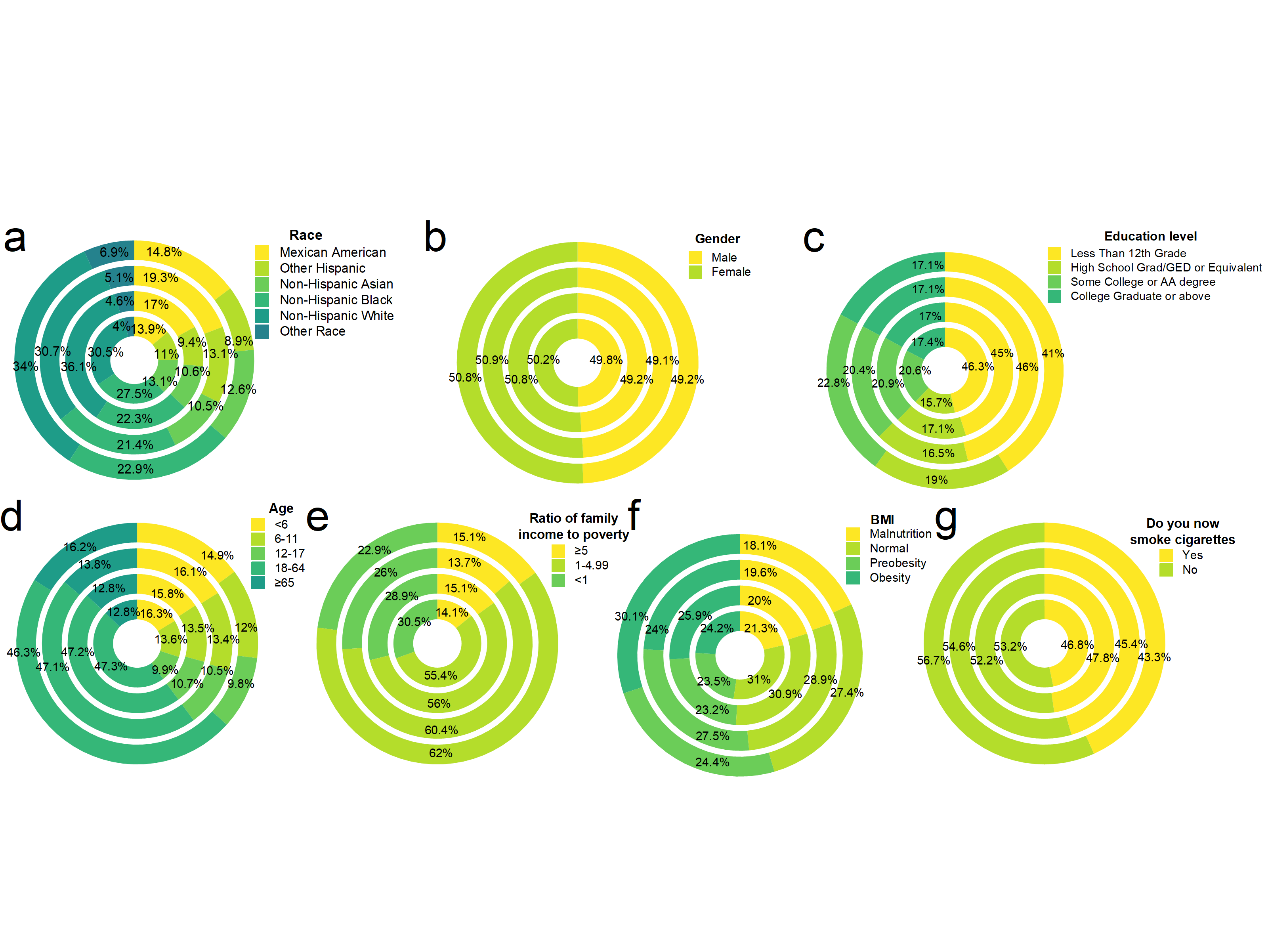
**

**Figure S2** Circular diagrams showing the study participants composition. The seven circular diagrams are respectively about the population race, gender, education level, age, poverty-to-income ratio (PIR), body mass index (BMI) and smoking quantity.
